# Supplementary material for: IgA transcytosis and antigen recognition govern ovarian cancer immunity
Source: PubMed Central journal article supplement (PMC7969354; doi:10.1038/s41586-020-03144-0), 2021-02-03
Supplement: 41586_2020_3144_MOESM1_ESM.pdf [file 41586_2020_3144_MOESM1_ESM.pdf]

---

**Supplementary information**

---

**IgA transcytosis and antigen recognition  
govern ovarian cancer immunity**

---

In the format provided by the  
authors and unedited

# Supplementary Figure 1

## Uncropped western blots

Fig1c\_Center and Right

PIGR\_Center

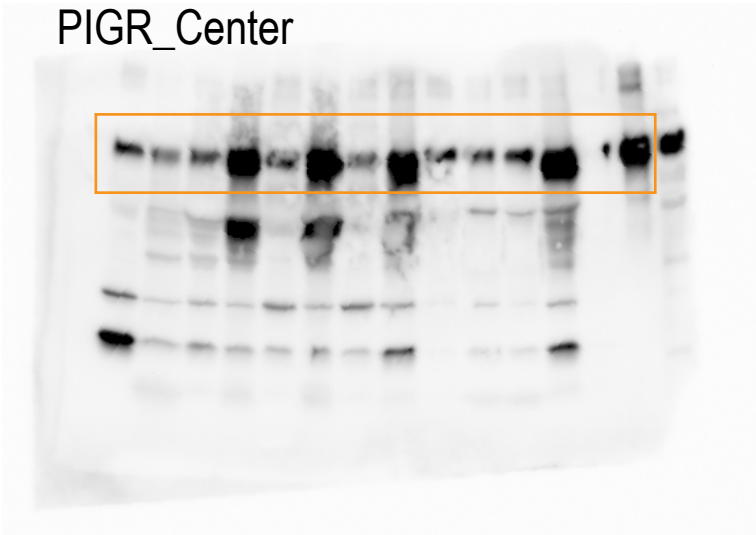

$\beta$ -actin\_Center

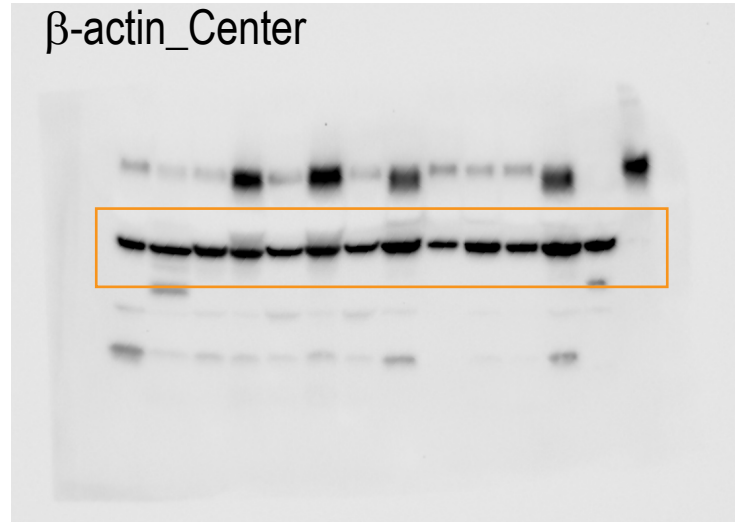

PIGR\_Right

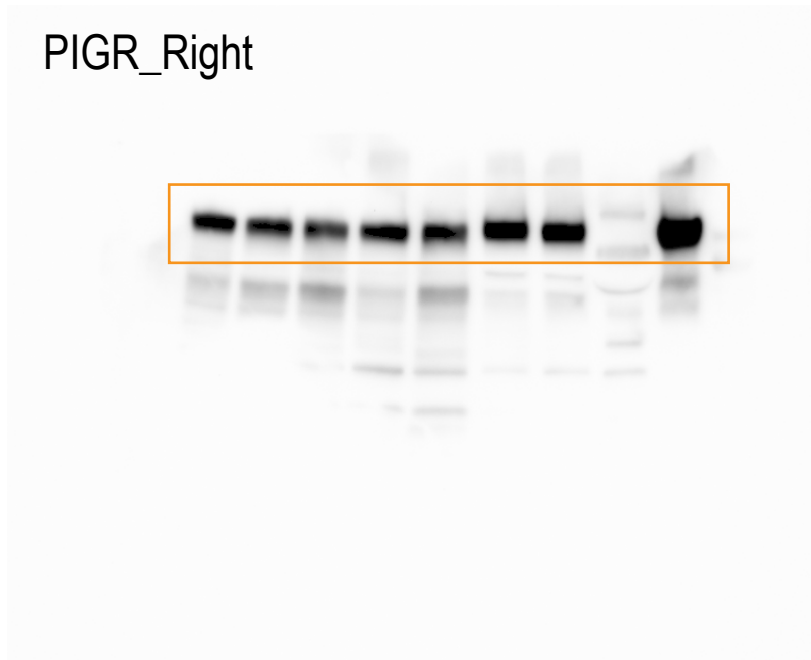

$\beta$ -actin\_Right

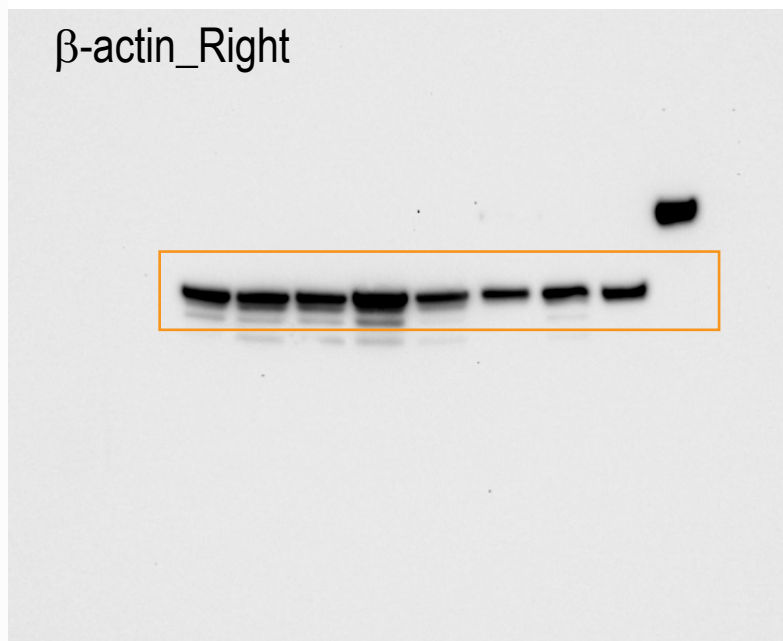

PIGR\_Left\_Blot1

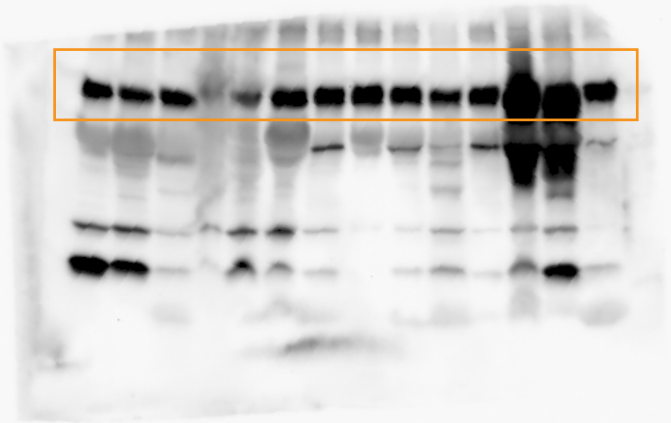

PIGR\_Left\_Blot2

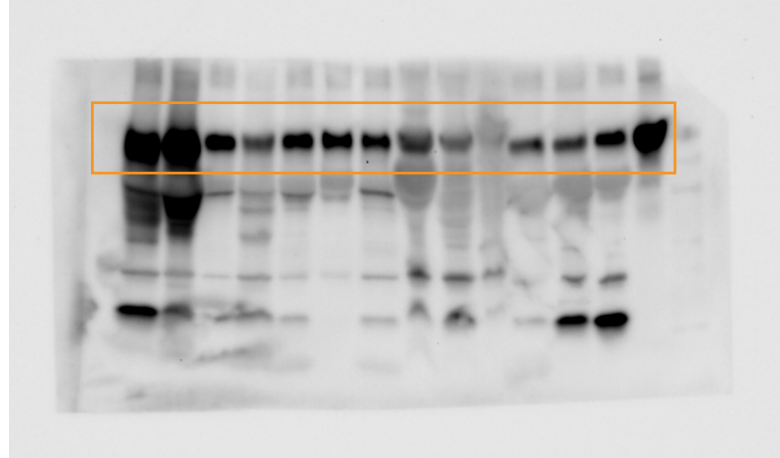

IgA\_Left\_Blot1

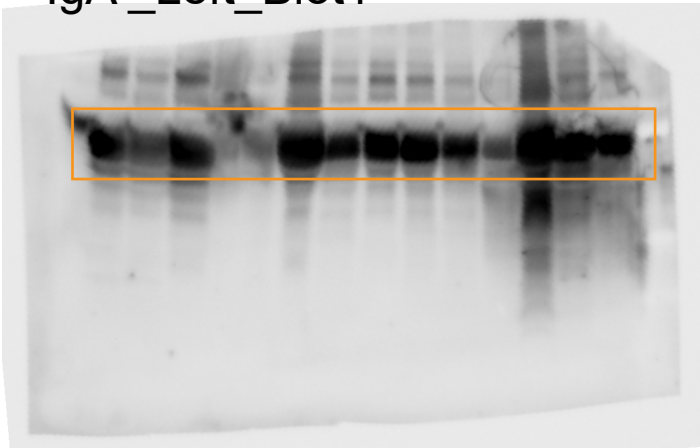

IgA\_Left\_Blot2

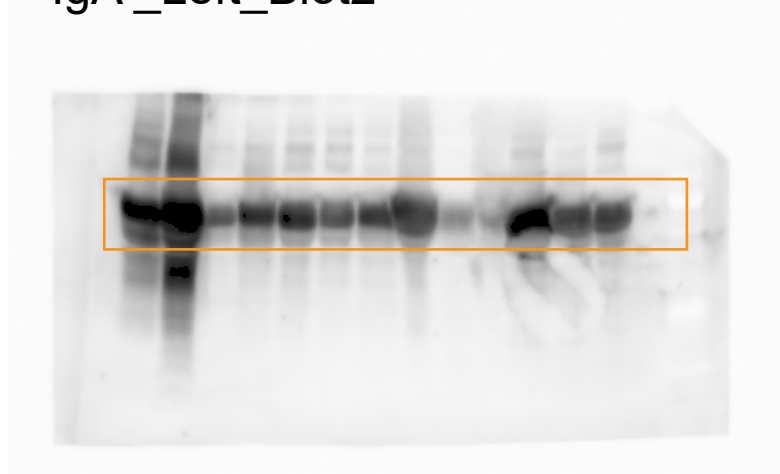

$\beta$ -actin\_Left\_Blot1

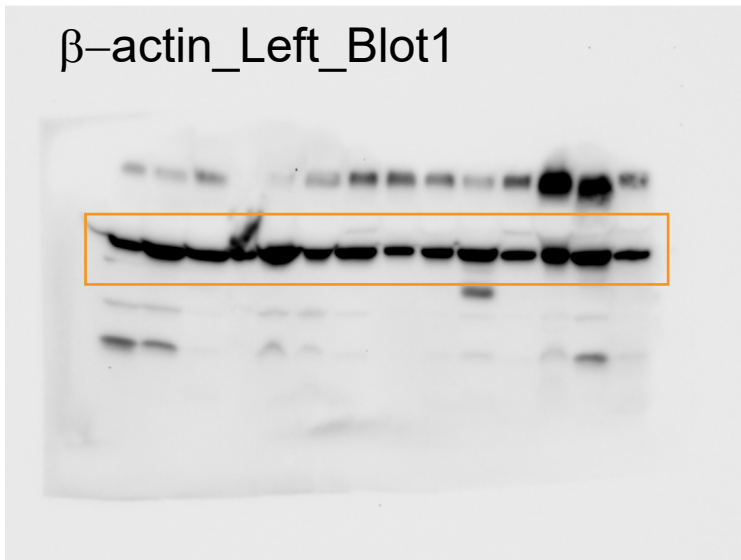

$\beta$ -actin\_Left\_Blot2

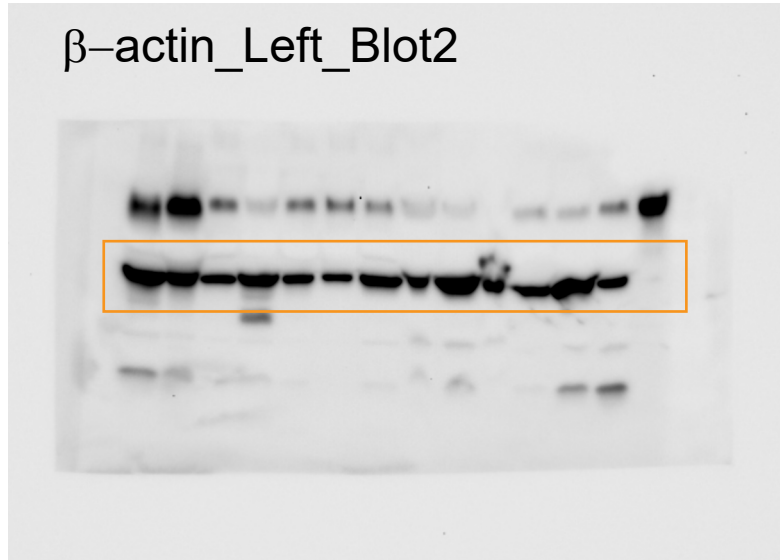

Secretory Component

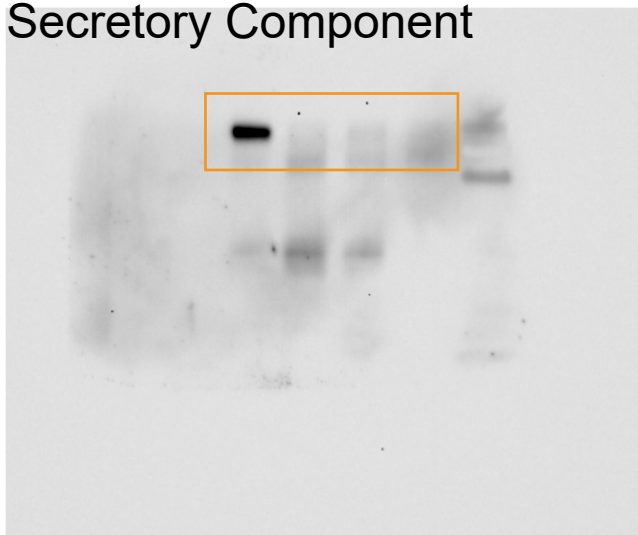

IgA

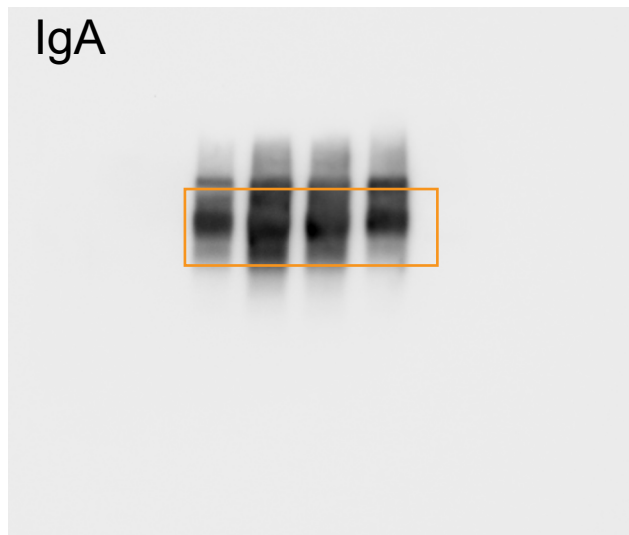

Left panel (IgA treated OVCAR3)

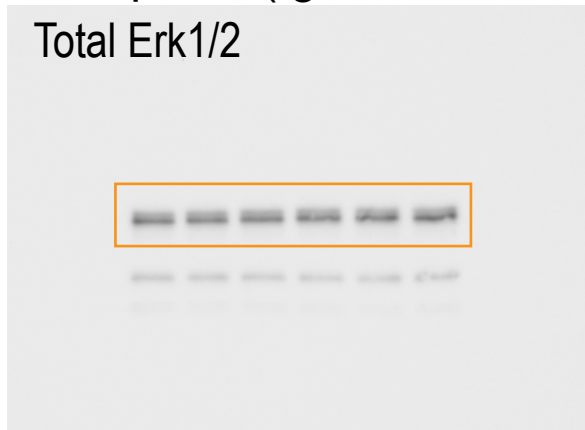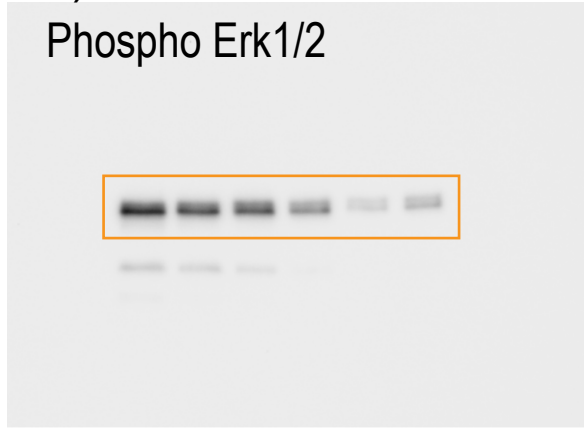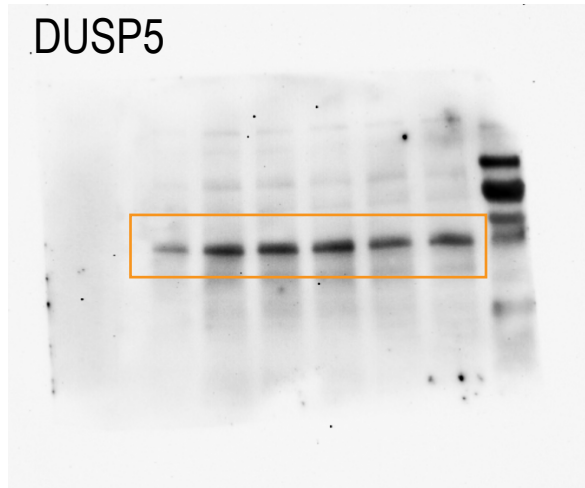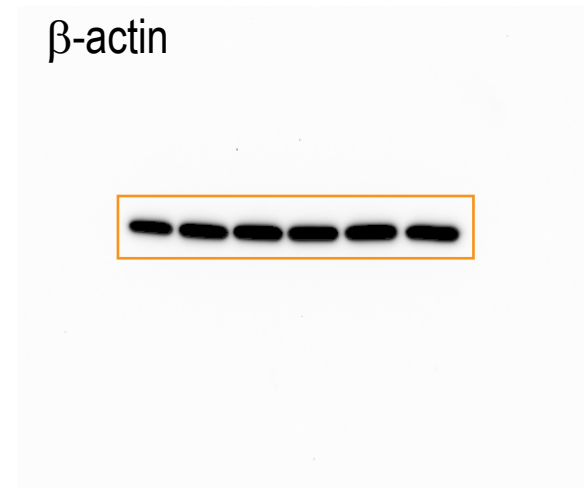

Right panel (IgG treated OVCAR3)

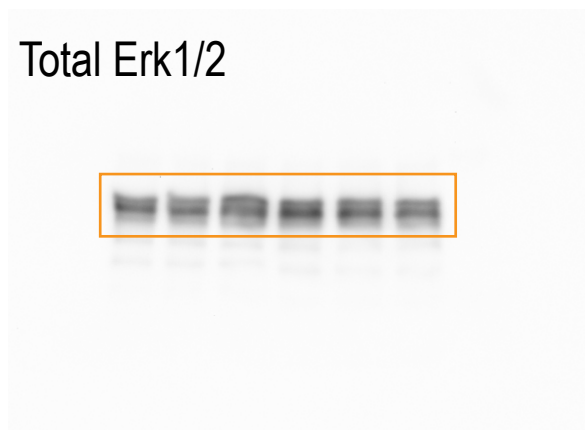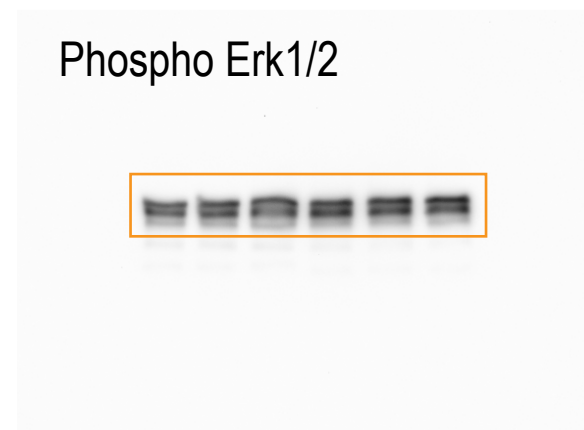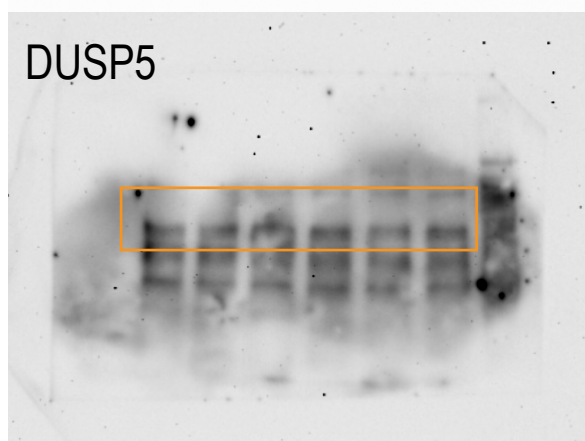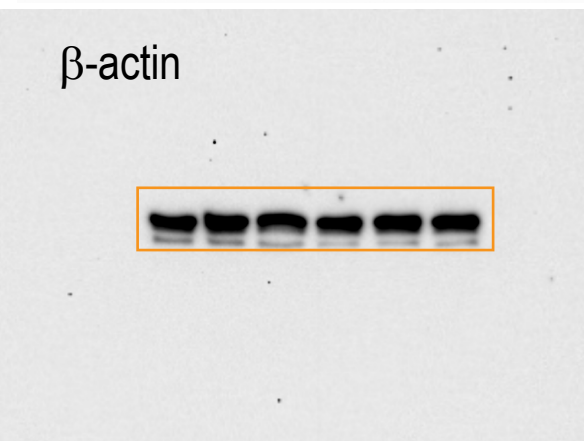

Left panel

TSPAN7

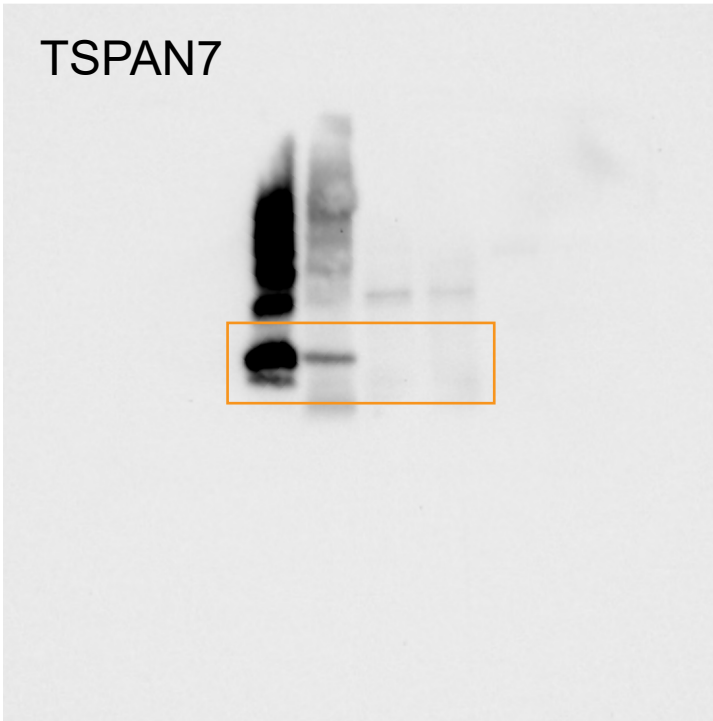

$\beta$ -actin for TSPAN7

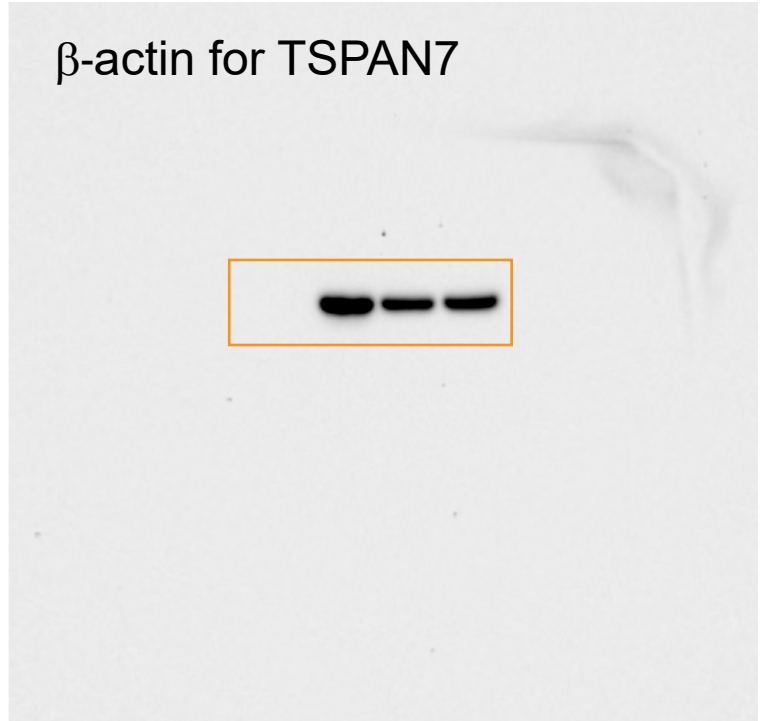

Right panel

BDNF

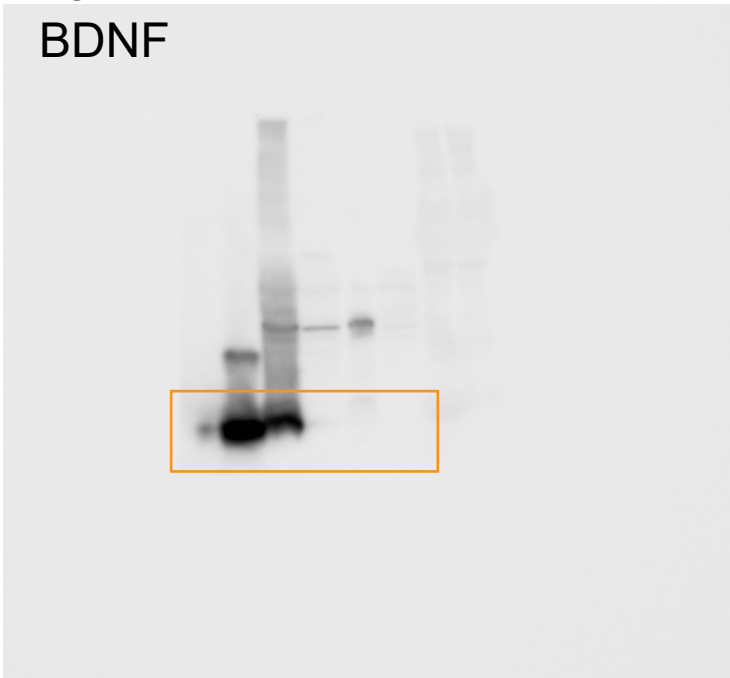

$\beta$ -actin for BDNF

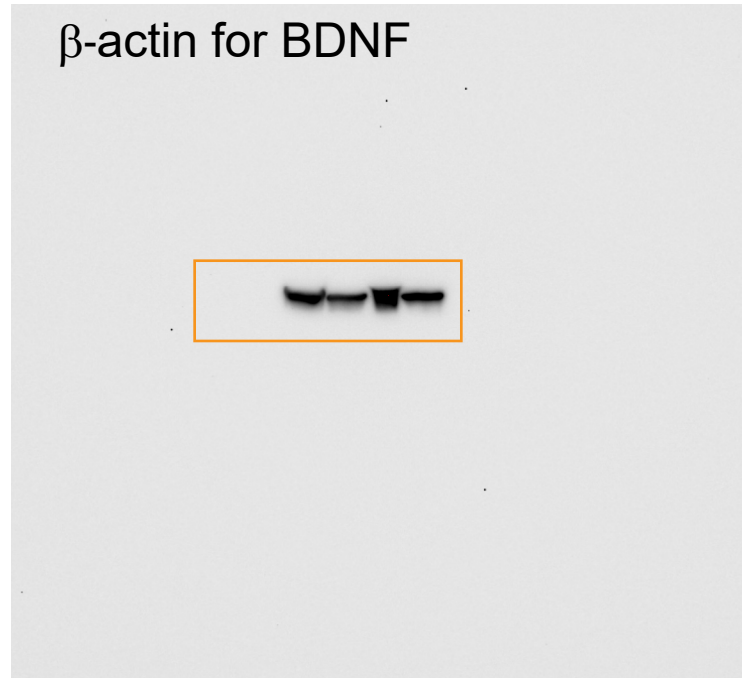

Extended Data Figure 3c

PIGR\_left panel

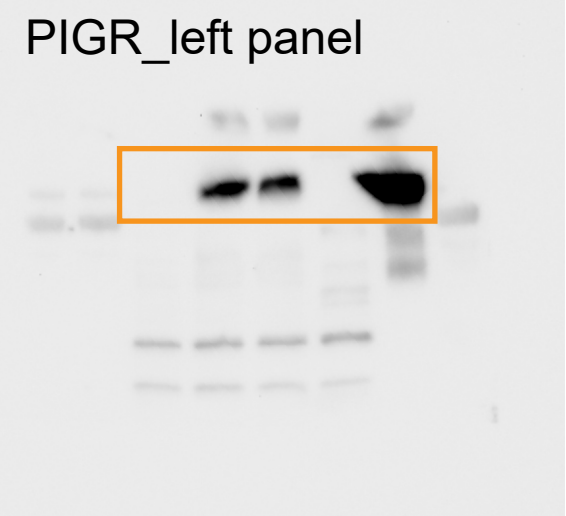

$\beta$ -actin\_left panel

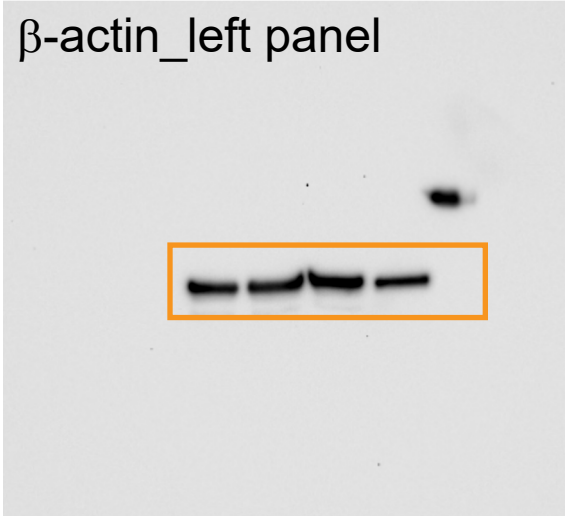

PIGR\_right panel

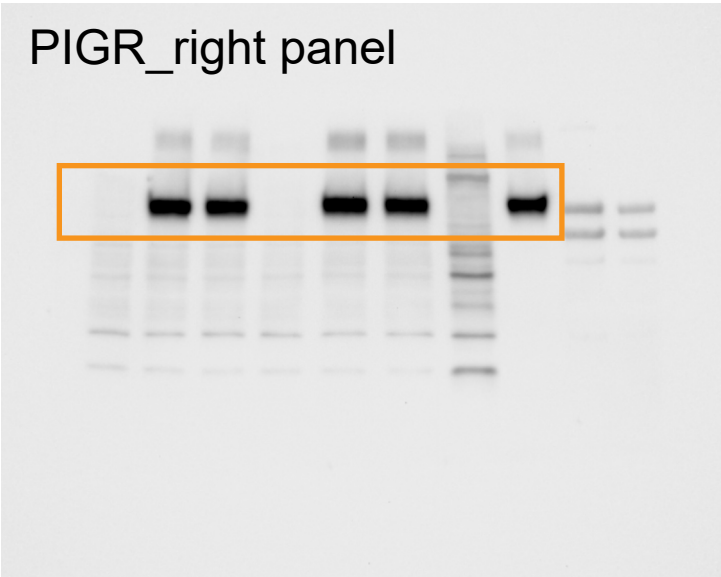

$\beta$ -actin\_right panel

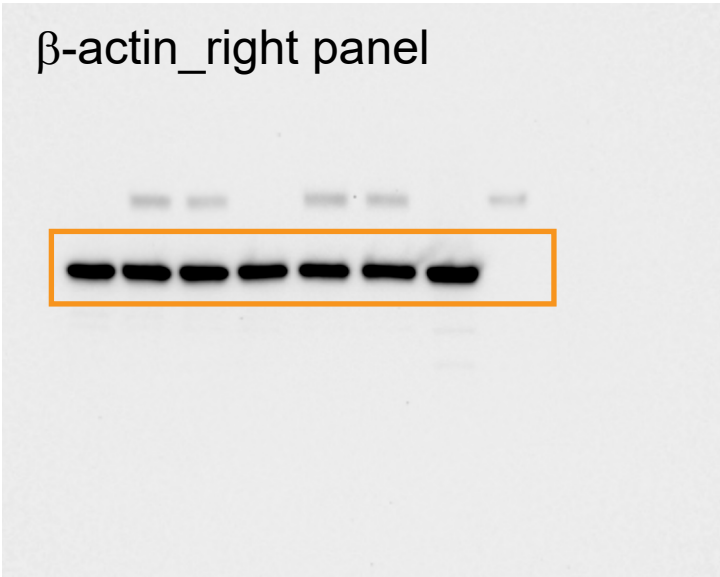

Extended Data Figure 4a

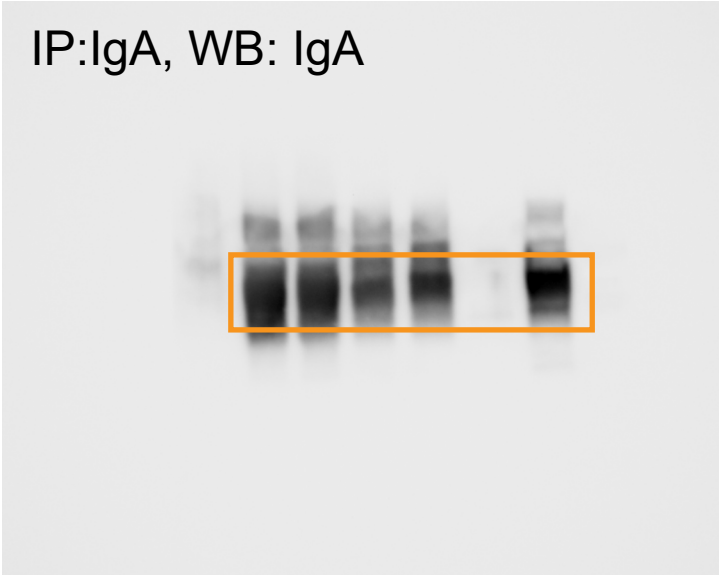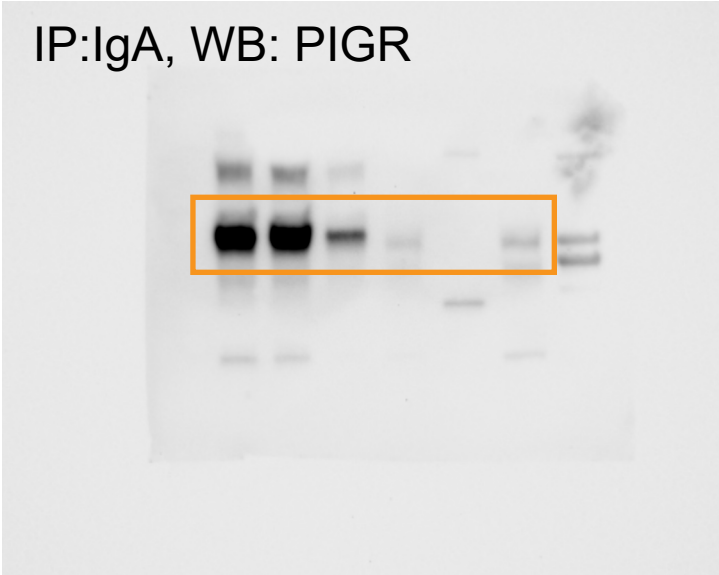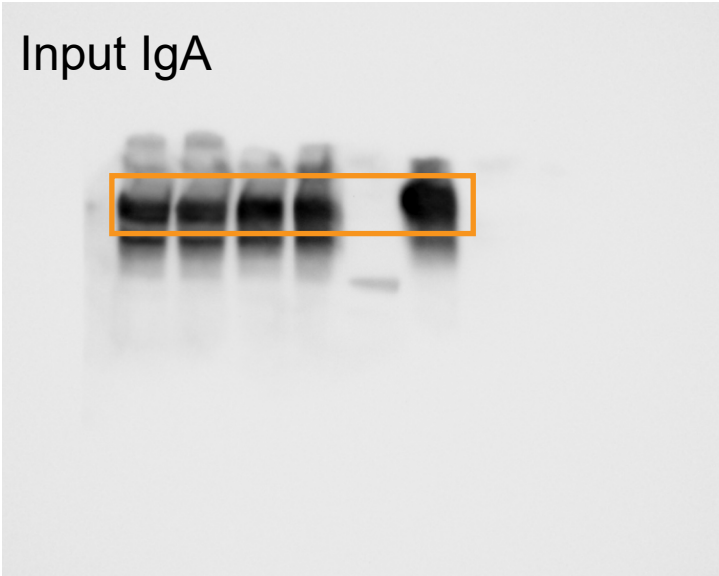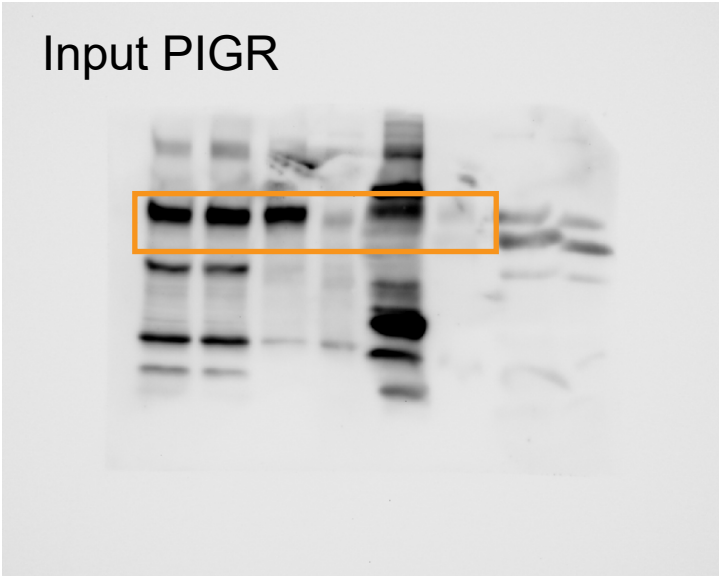



Extended Data Figure 4h

t-ERK1/2\_Left panel

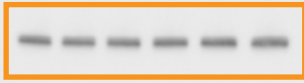

t-ERK1/2\_Right panel

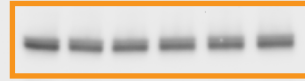

p-ERK1/2\_Left panel

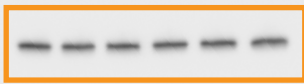

p-ERK1/2\_Right panel

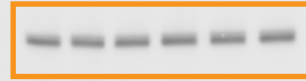

DUSP5\_Left panel

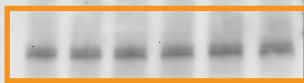

DUSP5\_Right panel

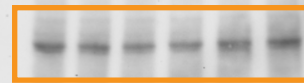

$\beta$ -actin\_Left panel

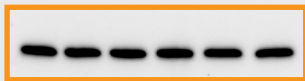

$\beta$ -actin\_Right panel

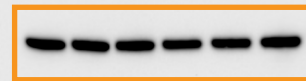

## Supplementary Table 1

### Statistical information associated with Figure 1a

| Ig -class | Population   | Min.        | 25th Percentile | Median      | 75th Percentile | Max.        | IQR         |
|-----------|--------------|-------------|-----------------|-------------|-----------------|-------------|-------------|
| IgA       | B cells      | 0.214285714 | 0.585060351     | 0.691489362 | 0.80126183      | 1           | 0.216201479 |
| IgA       | Plasma cells | 0.333333333 | 0.402777778     | 0.493519442 | 0.644444444     | 0.909090909 | 0.241666667 |
| IgA       | Plasmablasts | 0.289473684 | 0.42503639      | 0.537878788 | 0.666666667     | 1           | 0.241630277 |
| IgG       | B cells      | 0           | 0.011288805     | 0.031914894 | 0.075709779     | 0.333333333 | 0.064420974 |
| IgG       | Plasma cells | 0.037220844 | 0.218181818     | 0.35413643  | 0.414755733     | 0.584541063 | 0.196573915 |
| IgG       | Plasmablasts | 0           | 0.257575758     | 0.331491713 | 0.446969697     | 0.537425854 | 0.189393939 |
| IgM       | B cells      | 0           | 0.134241245     | 0.210526316 | 0.333333333     | 0.785714286 | 0.199092088 |
| IgM       | Plasma cells | 0           | 0.076719577     | 0.130434783 | 0.2             | 0.397022333 | 0.123280423 |
| IgM       | Plasmablasts | 0           | 0.051313436     | 0.102040816 | 0.166666667     | 0.243093923 | 0.115353231 |

Horizontal black lines with each box present median values; boxes extend from 25<sup>th</sup> to 75<sup>th</sup> percentile of values; whiskers extend to a maximum of 1.5 X IQR (interquartile range=75<sup>th</sup> percentile-25<sup>th</sup> percentile) beyond the boxes; dots denote the value of all observations for each box; the lowest dots are the minimum values and highest dots are the maximum values for each box.

| Comparison between | P value | Test performed                                                                                                               |
|--------------------|---------|------------------------------------------------------------------------------------------------------------------------------|
| IgA vs. IgG        | 1e-10   | Two-way ANOVA followed by Dunnett's ad hoc tests for multiple comparison was performed on arcsin-transformed percentage data |
| IgA vs. IgM        | 1e-10   |                                                                                                                              |

## Supplementary Table 2

### Statistical information associated with Figure 2a

| Cell type                     | Treatment and time | Number of cells<br>( <i>n</i> ) quantified |
|-------------------------------|--------------------|--------------------------------------------|
| WT OVCAR3                     | IgG, 0 min         | 319                                        |
| WT OVCAR3                     | IgG, 15 min        | 290                                        |
| WT OVCAR3                     | IgG, 1 hr          | 342                                        |
| WT OVCAR3                     | IgG, 8 hr          | 366                                        |
| WT OVCAR3                     | IgA, 0 min         | 348                                        |
| WT OVCAR3                     | IgA, 15 min        | 287                                        |
| WT OVCAR3                     | IgA, 1 hr          | 342                                        |
| WT OVCAR3                     | IgA, 8 hr          | 278                                        |
| WT OVCAR3                     | Pep-IgA, 0 min     | 212                                        |
| WT OVCAR3                     | Pep-IgA, 15 min    | 307                                        |
| WT OVCAR3                     | Pep-IgA, 1 hr      | 321                                        |
| WT OVCAR3                     | Pep-IgA, 8 hr      | 278                                        |
| PIGR <sup>CRSIPR</sup> OVCAR3 | IgA, 0 min         | 282                                        |
| PIGR <sup>CRSIPR</sup> OVCAR3 | IgA, 15 min        | 260                                        |
| PIGR <sup>CRSIPR</sup> OVCAR3 | IgA, 1 hr          | 313                                        |
| PIGR <sup>CRSIPR</sup> OVCAR3 | IgA, 8 hr          | 304                                        |

| Between treatment groups                                       | <i>P</i> value | Test performed             |
|----------------------------------------------------------------|----------------|----------------------------|
| WT OVCAR3 IgA_0 min vs. WT_OVACR3_IgA_15 min                   | <0.0001        | Unpaired two-tailed t-test |
| WT_OVCAR3_IgA_15 min vs. WT_OVACR3_IgA_1 hr                    | <0.0001        | Unpaired two-tailed t-test |
| WT_OVACR3_IgA_1 hr vs. WT_OVACR3_IgA_8 hr                      | <0.0001        | Unpaired two-tailed t-test |
| WT_OVCAR3_IgG_8 hr vs. WT_OVACR3_IgA_8 hr                      | <0.0001        | Unpaired two-tailed t-test |
| WT_OVCAR3_IgA_8 hr vs. WT_OVACR3_Pep-IgA_8 hr                  | <0.0001        | Unpaired two-tailed t-test |
| WT_OVCAR3_IgA_8 hr vs. PIGR <sup>CRSIPR</sup> _OVACR3_IgA_8 hr | <0.0001        | Unpaired two-tailed t-test |

### Statistical information associated with Figure 2f

| Effector cell type              | Target cell type                 | Target-<br>effector ratio | <i>P</i> value | Test<br>performed          |
|---------------------------------|----------------------------------|---------------------------|----------------|----------------------------|
| NY-ESO-1-TCR-transduced T-cells | OVCAR3 <sup>Luci</sup> -NY-ESO-1 | 1:1                       | 0.0127         | ordinary one-<br>way ANOVA |
| NY-ESO-1-TCR-transduced T-cells | OVCAR3 <sup>Luci</sup> -NY-ESO-1 | 1:10                      | 0.0255         |                            |
| NY-ESO-1-TCR-transduced T-cells | OVCAR3 <sup>Luci</sup> -NY-ESO-1 | 1:20                      | 0.0063         |                            |
| FSH-CER T-cells                 | OVCAR3 <sup>Luci</sup>           | 1:1                       | 0.0248         |                            |
| FSH-CER T-cells                 | OVCAR3 <sup>Luci</sup>           | 1:10                      | 0.0006         |                            |
| FSH-CER T-cells                 | OVCAR3 <sup>Luci</sup>           | 1:20                      | <0.0001        |                            |

### Supplementary Table 3

#### Statistical information associated with Figure 3b

##### Growth curve statistics

| Between treatment groups | <i>P</i> value | Test performed           |
|--------------------------|----------------|--------------------------|
| Tumour#1: PBS vs. iIgA   | 0.0155         | Paired two-tailed t-test |
| Tumour#1: iIgA vs. Ab1   | 0.0144         | Paired two-tailed t-test |
| Tumour#2: PBS vs. iIgA   | 0.0175         | Paired two-tailed t-test |
| Tumour#2: iIgA vs. Ab2   | 0.0044         | Paired two-tailed t-test |
| Tumour#2: iIgA vs. Ab3   | 0.0061         | Paired two-tailed t-test |

##### Tumour weight statistics

| Between treatment groups | <i>P</i> value | Test performed             |
|--------------------------|----------------|----------------------------|
| Tumour#1: PBS vs. iIgA   | <0.0001        | Unpaired two-tailed t-test |
| Tumour#1: iIgA vs. Ab1   | <0.0001        | Unpaired two-tailed t-test |
| Tumour#2: PBS vs. iIgA   | <0.0001        | Unpaired two-tailed t-test |
| Tumour#2: iIgA vs. Ab2   | <0.0001        | Unpaired two-tailed t-test |
| Tumour#2: iIgA vs. Ab3   | <0.0001        | Unpaired two-tailed t-test |

## Supplementary Table 4

### Statistical information associated with Figure 3d

#### Growth curve statistics

| Between treatment groups          | <i>P</i> value | Test performed           |
|-----------------------------------|----------------|--------------------------|
| iIgA vs. iIgG                     | 0.0292         | Paired two-tailed t-test |
| iIgA vs. $\alpha$ TSPAN7          | 0.0177         | Paired two-tailed t-test |
| $\alpha$ TSPAN7 vs. $\alpha$ BDNF | 0.0064         | Paired two-tailed t-test |

#### Tumour weight statistics

| Between treatment groups | <i>P</i> value | Test performed             |
|--------------------------|----------------|----------------------------|
| iIgA vs. iIgG            | 0.0006         | Unpaired two-tailed t-test |
| iIgA vs. $\alpha$ TSPAN7 | 0.0308         | Unpaired two-tailed t-test |
| iIgA vs. $\alpha$ BDNF   | 0.0465         | Unpaired two-tailed t-test |

## Supplementary Table 5

### Statistical information associated with Figure 3f

#### Growth curve statistics

| Between treatment groups                                    | <i>P</i> value | Test performed           |
|-------------------------------------------------------------|----------------|--------------------------|
| F(ab') <sub>2</sub> -αTSPAN7 vs. F(ab') <sub>2</sub> -αBDNF | 0.0255         | Paired two-tailed t-test |
| F(ab') <sub>2</sub> -iIgA vs. F(ab') <sub>2</sub> -iIgG     | 0.0563         | Paired two-tailed t-test |

#### Tumour weight statistics

| Between treatment groups                                    | <i>P</i> value | Test performed             |
|-------------------------------------------------------------|----------------|----------------------------|
| F(ab') <sub>2</sub> -αTSPAN7 vs. F(ab') <sub>2</sub> -αBDNF | 0.0030         | Unpaired two-tailed t-test |
| F(ab') <sub>2</sub> -iIgA vs. F(ab') <sub>2</sub> -αBDNF    | 0.0006         | Unpaired two-tailed t-test |
| F(ab') <sub>2</sub> -iIgA vs. F(ab') <sub>2</sub> -iIgG     | 0.6145         | Unpaired two-tailed t-test |
| F(ab') <sub>2</sub> -iIgA vs. F(ab') <sub>2</sub> -αTSPAN7  | 0.3231         | Unpaired two-tailed t-test |

## Supplementary Table 6

### Statistical information associated with Figure 4a

#### Growth curve statistics

| Between treatment groups | <i>P</i> value | Test performed           |
|--------------------------|----------------|--------------------------|
| iIgA vs. PBS             | 0.0067         | Paired two-tailed t-test |
| iIgA vs. $\alpha$ TSPAN7 | 0.1504         | Paired two-tailed t-test |

#### Tumour weight statistics

| Between treatment groups | <i>P</i> value | Test performed             |
|--------------------------|----------------|----------------------------|
| iIgA vs. PBS             | <0.0001        | Unpaired two-tailed t-test |
| iIgA vs. $\alpha$ TSPAN7 | 0.4336         | Unpaired two-tailed t-test |

## Supplementary Table 7

### Statistical information associated with Figure 4b

#### Growth curve statistics

| Between treatment groups                 | <i>P</i> value | Test performed           |
|------------------------------------------|----------------|--------------------------|
| iIgA vs. PBS                             | 0.0197         | Paired two-tailed t-test |
| iIgA vs. $\alpha$ TSPAN7                 | 0.0140         | Paired two-tailed t-test |
| iIgA vs. $\alpha$ TSPAN7+ $\alpha$ NK1.1 | 0.0175         | Paired two-tailed t-test |

#### Tumour weight statistics

| Between treatment groups                            | <i>P</i> value | Test performed             |
|-----------------------------------------------------|----------------|----------------------------|
| iIgA vs. PBS                                        | <0.0001        | Unpaired two-tailed t-test |
| iIgA vs. $\alpha$ TSPAN7                            | 0.0004         | Unpaired two-tailed t-test |
| $\alpha$ TSPAN7 vs. $\alpha$ TSPAN7+ $\alpha$ NK1.1 | 0.9119         | Unpaired two-tailed t-test |



## Supplementary Table 8

### Statistical information associated with Figure 4d

| Between treatment groups                                                                                                                          | <i>P</i> value | Test performed             |
|---------------------------------------------------------------------------------------------------------------------------------------------------|----------------|----------------------------|
| Uncoated:with- $\alpha$ CD351 <sup>Neut</sup> vs. Uncoated:no- $\alpha$ CD351 <sup>Neut</sup>                                                     | 0.8115         | Unpaired two-tailed t-test |
| $\alpha$ TSPAN7 <sup>coated</sup> .with- $\alpha$ CD351 <sup>Neut</sup> vs. $\alpha$ TSPAN7 <sup>coated</sup> .no- $\alpha$ CD351 <sup>Neut</sup> | 0.0244         | Unpaired two-tailed t-test |

### Statistical information associated with Figure 4e

| Between treatment groups                            | <i>P</i> value | Test performed             |
|-----------------------------------------------------|----------------|----------------------------|
| PBS vs. iIgA                                        | 0.0036         | Unpaired two-tailed t-test |
| iIgA vs. $\alpha$ TSPAN7                            | 0.0132         | Unpaired two-tailed t-test |
| $\alpha$ TSPAN7 vs. $\alpha$ TSPAN7+ $\alpha$ NK1.1 | 0.6264         | Unpaired two-tailed t-test |

## Supplementary Table 9

### Statistical information associated with Figure 4f

#### Growth curve statistics

| Between treatment groups  | <i>P</i> value | Test performed           |
|---------------------------|----------------|--------------------------|
| WT:iIgA vs. WT:PBS        | 0.0068         | Paired two-tailed t-test |
| WT:iIgA vs. CR:IgA        | 0.0015         | Paired two-tailed t-test |
| WT:αBDNF vs. CR:αBDNF     | 0.0107         | Paired two-tailed t-test |
| WT:αTSPAN7 vs. CR:αTSPAN7 | 0.0080         | Paired two-tailed t-test |
| WT:PBS vs. CR:PBS         | 0.1143         | Paired two-tailed t-test |
| WT:PBS vs. CR:iIgA        | 0.9062         | Paired two-tailed t-test |

#### Tumour weight statistics

| Between treatment groups  | <i>P</i> value | Test performed             |
|---------------------------|----------------|----------------------------|
| WT:iIgA vs. CR:iIgA       | 0.0266         | Unpaired two-tailed t-test |
| WT:αBDNF vs. CR:αBDNF     | 0.7354         | Unpaired two-tailed t-test |
| WT:αTSPAN7 vs. CR:αTSPAN7 | 0.0009         | Unpaired two-tailed t-test |
| WT:PBS vs. CR:PBS         | 0.8425         | Unpaired two-tailed t-test |
| CR:PBS vs. CR:iIgA        | 0.8637         | Unpaired two-tailed t-test |

## Supplementary Table 10

| Patient Derived specimens |       |                              |                                  |
|---------------------------|-------|------------------------------|----------------------------------|
| Specimen type             | ID    | Experiment                   | Description                      |
| Solid tumours             | S1    | FACS, B cell immortalization | High grade Serous Ovarian Cancer |
| Solid tumours             | S2    | FACS, B cell immortalization | High grade Serous Ovarian Cancer |
| Solid tumours             | S3    | FACS                         | High grade Serous Ovarian Cancer |
| Solid tumours             | S4    | FACS                         | High grade Serous Ovarian Cancer |
| Solid tumours             | S5    | FACS, B cell immortalization | High grade Serous Ovarian Cancer |
| Solid tumours             | S6    | FACS                         | High grade Serous Ovarian Cancer |
| Solid tumours             | S7    | FACS, B cell immortalization | High grade Serous Ovarian Cancer |
| Solid tumours             | S8    | FACS                         | High grade Serous Ovarian Cancer |
| Solid tumours             | S9    | FACS                         | High grade Serous Ovarian Cancer |
| Solid tumours             | S10   | FACS, BCR sequencing         | High grade Serous Ovarian Cancer |
| Solid tumours             | S11   | FACS, B cell immortalization | High grade Serous Ovarian Cancer |
| Solid tumours             | S12   | FACS                         | High grade Serous Ovarian Cancer |
| Solid tumours             | S13   | FACS                         | High grade Serous Ovarian Cancer |
| Solid tumours             | S14   | FACS, B cell immortalization | High grade Serous Ovarian Cancer |
| Solid tumours             | S15   | FACS, B cell immortalization | High grade Serous Ovarian Cancer |
| Solid tumours             | S16   | FACS                         | High grade Serous Ovarian Cancer |
| Solid tumours             | S17   | FACS                         | High grade Serous Ovarian Cancer |
| Solid tumours             | S18   | FACS, B cell immortalization | High grade Serous Ovarian Cancer |
| Solid tumours             | S19   | FACS                         | High grade Serous Ovarian Cancer |
| Solid tumours             | S20   | FACS                         | High grade Serous Ovarian Cancer |
| Solid tumours             | S21   | FACS, B cell immortalization | High grade Serous Ovarian Cancer |
| Solid tumours             | S22   | FACS, B cell immortalization | High grade Serous Ovarian Cancer |
| Solid tumours             | S23   | FACS                         | High grade Serous Ovarian Cancer |
| Solid tumours             | S24   | FACS                         | High grade Serous Ovarian Cancer |
| Solid tumours             | S25   | FACS                         | High grade Serous Ovarian Cancer |
| Solid tumours             | S26   | FACS                         | High grade Serous Ovarian Cancer |
| Solid tumours             | S27   | FACS                         | High grade Serous Ovarian Cancer |
| Solid tumours             | S28   | FACS                         | High grade Serous Ovarian Cancer |
| Solid tumours             | S29   | FACS, BCR sequencing         | High grade Serous Ovarian Cancer |
| Ascites                   | A1    | Co-Immunoprecipitation       | High grade Serous Ovarian Cancer |
| Ascites                   | A2    | Co-Immunoprecipitation       | High grade Serous Ovarian Cancer |
| FFPE-TMA                  | MCC1  | Multiplex Immunofluorescence | High grade Serous Ovarian Cancer |
| FFPE-TMA                  | MCC2  | Multiplex Immunofluorescence | High grade Serous Ovarian Cancer |
| FFPE-TMA                  | MCC3  | Multiplex Immunofluorescence | High grade Serous Ovarian Cancer |
| FFPE-TMA                  | MCC4  | Multiplex Immunofluorescence | High grade Serous Ovarian Cancer |
| FFPE-TMA                  | MCC5  | Multiplex Immunofluorescence | High grade Serous Ovarian Cancer |
| FFPE-TMA                  | MCC6  | Multiplex Immunofluorescence | High grade Serous Ovarian Cancer |
| FFPE-TMA                  | MCC7  | Multiplex Immunofluorescence | High grade Serous Ovarian Cancer |
| FFPE-TMA                  | MCC8  | Multiplex Immunofluorescence | High grade Serous Ovarian Cancer |
| FFPE-TMA                  | MCC9  | Multiplex Immunofluorescence | High grade Serous Ovarian Cancer |
| FFPE-TMA                  | MCC10 | Multiplex Immunofluorescence | High grade Serous Ovarian Cancer |
| FFPE-TMA                  | MCC11 | Multiplex Immunofluorescence | High grade Serous Ovarian Cancer |
| FFPE-TMA                  | MCC12 | Multiplex Immunofluorescence | High grade Serous Ovarian Cancer |
| FFPE-TMA                  | MCC13 | Multiplex Immunofluorescence | High grade Serous Ovarian Cancer |
| FFPE-TMA                  | MCC14 | Multiplex Immunofluorescence | High grade Serous Ovarian Cancer |
| FFPE-TMA                  | MCC15 | Multiplex Immunofluorescence | High grade Serous Ovarian Cancer |























## Supplementary Table 11

### Statistical information associated with Extended data figure 6e

| Cell type                     | Treatment       | Number of cells ( <i>n</i> )<br>quantified |
|-------------------------------|-----------------|--------------------------------------------|
| WT OVCAR3                     | $\alpha$ TSPAN7 | 338                                        |
| PIGR <sup>CRISPR</sup> OVCAR3 | $\alpha$ TSPAN7 | 319                                        |
| WT OVCAR3                     | $\alpha$ BDNF   | 400                                        |
| PIGR <sup>CRISPR</sup> OVCAR3 | $\alpha$ BDNF   | 346                                        |
| WT OVCAR3                     | iIgA            | 244                                        |
| PIGR <sup>CRISPR</sup> OVCAR3 | iIgA            | 311                                        |
| WT OVCAR3                     | iIgG            | 420                                        |

| Between treatment groups                                         | <i>P</i> value | Test performed             |
|------------------------------------------------------------------|----------------|----------------------------|
| WT: $\alpha$ TSPAN7 vs. PIGR <sup>CRISPR</sup> : $\alpha$ TSPAN7 | <0.0001        | Unpaired two-tailed t-test |
| WT: $\alpha$ BDNF vs. PIGR <sup>CRISPR</sup> : $\alpha$ BDNF     | <0.0001        | Unpaired two-tailed t-test |
| WT:iIgA vs. PIGR <sup>CRISPR</sup> :iIgA                         | <0.0001        | Unpaired two-tailed t-test |

## Supplementary Table 12

### Statistical information associated with Extended data figure 6g

#### Growth curve statistics

| Between treatment groups                                               | <i>P</i> value | Test performed           |
|------------------------------------------------------------------------|----------------|--------------------------|
| Tumour#1: PIGR <sup>+</sup> :PBS vs. PIGR <sup>+</sup> :iIgA           | 0.0155         | Paired two-tailed t-test |
| Tumour#1: PIGR <sup>+</sup> :iIgA vs. PIGR <sup>+</sup> :Ab1           | 0.0144         | Paired two-tailed t-test |
| Tumour#1: PIGR <sup>+</sup> :Ab1 vs. PIGR <sup>CRISPR</sup> :Ab1       | 0.0172         | Paired two-tailed t-test |
| Tumour#1: PIGR <sup>+</sup> :iIgA vs. PIGR <sup>CRISPR</sup> :iIgA     | 0.0125         | Paired two-tailed t-test |
| Tumour#1: PIGR <sup>CRISPR</sup> :iIgA vs. PIGR <sup>CRISPR</sup> :Ab1 | 0.0120         | Paired two-tailed t-test |
| Tumour#2: PIGR <sup>+</sup> :PBS vs. PIGR <sup>+</sup> :iIgA           | 0.0175         | Paired two-tailed t-test |
| Tumour#2: PIGR <sup>+</sup> :iIgA vs. PIGR <sup>+</sup> :Ab2           | 0.0044         | Paired two-tailed t-test |
| Tumour#2: PIGR <sup>+</sup> :iIgA vs. PIGR <sup>+</sup> :Ab3           | 0.0061         | Paired two-tailed t-test |
| Tumour#2: PIGR <sup>+</sup> :iIgA vs. PIGR <sup>CRISPR</sup> :iIgA     | 0.0155         | Paired two-tailed t-test |
| Tumour#2: PIGR <sup>+</sup> :Ab2 vs. PIGR <sup>CRISPR</sup>            | 0.0113         | Paired two-tailed t-test |
| Tumour#2: PIGR <sup>+</sup> :Ab3 vs. PIGR <sup>CRISPR</sup>            | 0.0089         | Paired two-tailed t-test |
| Tumour#2: PIGR <sup>CRISPR</sup> :iIgA vs. PIGR <sup>CRISPR</sup>      | 0.0095         | Paired two-tailed t-test |
| Tumour#2: PIGR <sup>CRISPR</sup> :iIgA vs. PIGR <sup>CRISPR</sup>      | 0.0107         | Paired two-tailed t-test |

#### Tumour weight statistics

| Between treatment groups                                               | <i>P</i> value | Test performed             |
|------------------------------------------------------------------------|----------------|----------------------------|
| Tumour#1: PIGR <sup>+</sup> :iIgA vs. PIGR <sup>+</sup> :Ab1           | <0.0001        | Unpaired two-tailed t-test |
| Tumour#1: PIGR <sup>+</sup> :iIgA vs. PIGR <sup>CRISPR</sup> :iIgA     | <0.0001        | Unpaired two-tailed t-test |
| Tumour#1: PIGR <sup>+</sup> :Ab1 vs. PIGR <sup>CRISPR</sup> :Ab1       | <0.0001        | Unpaired two-tailed t-test |
| Tumour#1: PIGR <sup>CRISPR</sup> :iIgA vs. PIGR <sup>CRISPR</sup> :Ab1 | <0.0001        | Unpaired two-tailed t-test |
| Tumour#2: PIGR <sup>+</sup> :PBS vs. PIGR <sup>+</sup> :iIgA           | <0.0001        | Unpaired two-tailed t-test |
| Tumour#2: PIGR <sup>+</sup> :iIgA vs. PIGR <sup>+</sup> :Ab2           | <0.0001        | Unpaired two-tailed t-test |
| Tumour#2: PIGR <sup>+</sup> :iIgA vs. PIGR <sup>+</sup> :Ab3           | <0.0001        | Unpaired two-tailed t-test |
| Tumour#2: PIGR <sup>+</sup> :Ab2 vs. PIGR <sup>CRISPR</sup> :Ab2       | <0.0001        | Unpaired two-tailed t-test |
| Tumour#2: PIGR <sup>+</sup> :Ab3 vs. PIGR <sup>CRISPR</sup> :Ab3       | <0.0001        | Unpaired two-tailed t-test |
| Tumour#2: PIGR <sup>CRISPR</sup> :iIgA vs. PIGR <sup>CRISPR</sup> :Ab2 | <0.0001        | Unpaired two-tailed t-test |
| Tumour#2: PIGR <sup>CRISPR</sup> :iIgA vs. PIGR <sup>CRISPR</sup> :Ab3 | <0.0001        | Unpaired two-tailed t-test |
